# Supplementary material for: Strain engineering of selective chemical adsorption on monolayer MoS2
Source: Royal Society of Chemistry journal article supplement (doi:10.1039/c3nr06670c), 2014-01-01
Supplement: c3nr06670c1.pdf [file c3nr06670c1.pdf]

## Strain Engineering of Selective Chemical Adsorption on Monolayer MoS<sub>2</sub>

Liangzhi Kou<sup>a,\*</sup>, Aijun Du<sup>b</sup>, Changfeng Chen<sup>c</sup> and Thomas Frauenheim<sup>a</sup>

<sup>a</sup> Bremen Center for Computational Materials Science, University of Bremen, Am Falturm 1, 28359 Bremen, Germany

<sup>b</sup> School of Chemistry, Physics and Mechanical Engineering, Queensland University of Technology, Brisbane, QLD 4001, Australia

<sup>c</sup> Department of Physics and Astronomy and High Pressure Science and Engineering Center, University of Nevada, Las Vegas, Nevada, 89154, United States

\*Corresponding author: [kouliangzhi@gmail.com](mailto:kouliangzhi@gmail.com)

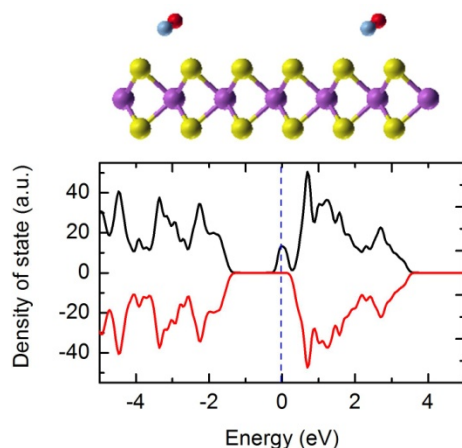

Figure S1. Top: structural model of the 4×4 MoS<sub>2</sub> with 2 NO adsorption; Bottom: the calculated electronic density of states, which shows that half-metallicity is preserved.

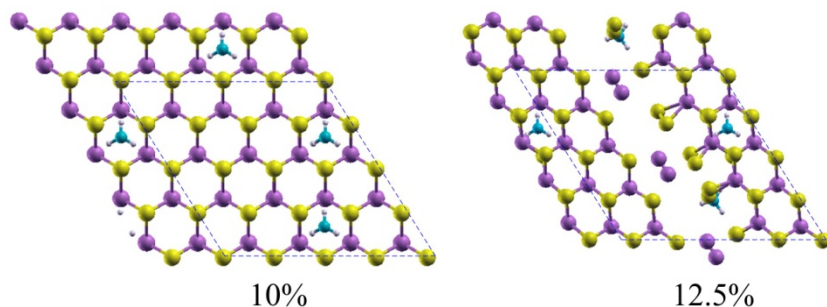

Figure S2. Structural breaking with the adsorption of two ammonia molecules, and the dashed frame denotes the studied supercell.

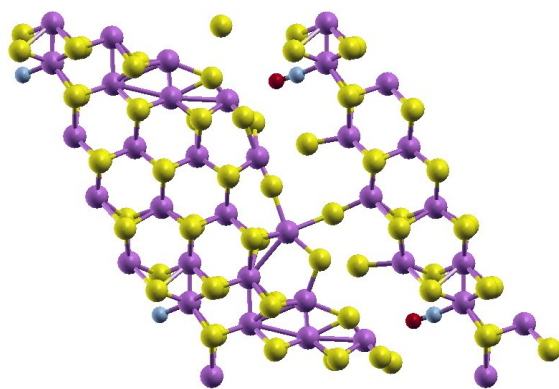

Figure S3. Relaxed structure of NO adsorbed MoS<sub>2</sub> under 18% strain.

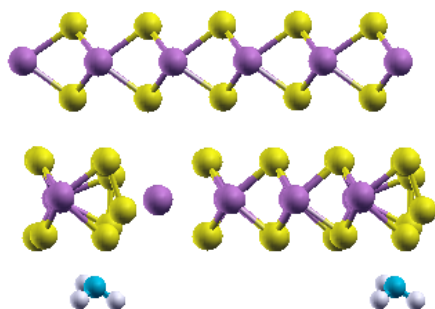

Figure S4. The structure of bilayer MoS<sub>2</sub> with NH<sub>3</sub> adsorption under 12.5% strain.
